# Supplementary material
Source: publisher figshare collection journal article supplement (https://karger.figshare.com/ndownloader/files/23726216)
Supplement: Supplementary file 1 [file 23726216]

**Supplementary figure 1**: Bland–Altman plot showing the agreement between sonographic cervical dilatation and cervical dilatation determined by vaginal examination according to parity status (left figure: nulliparous; right figure: multiparous)
